# Supplementary material
Source: PubMed Central journal article supplement (PMC3466969)
Supplement: supp_blood-2012-02-409524_blood-2012-02-409524-1.pdf [file supp_blood-2012-02-409524_blood-2012-02-409524-1.pdf]

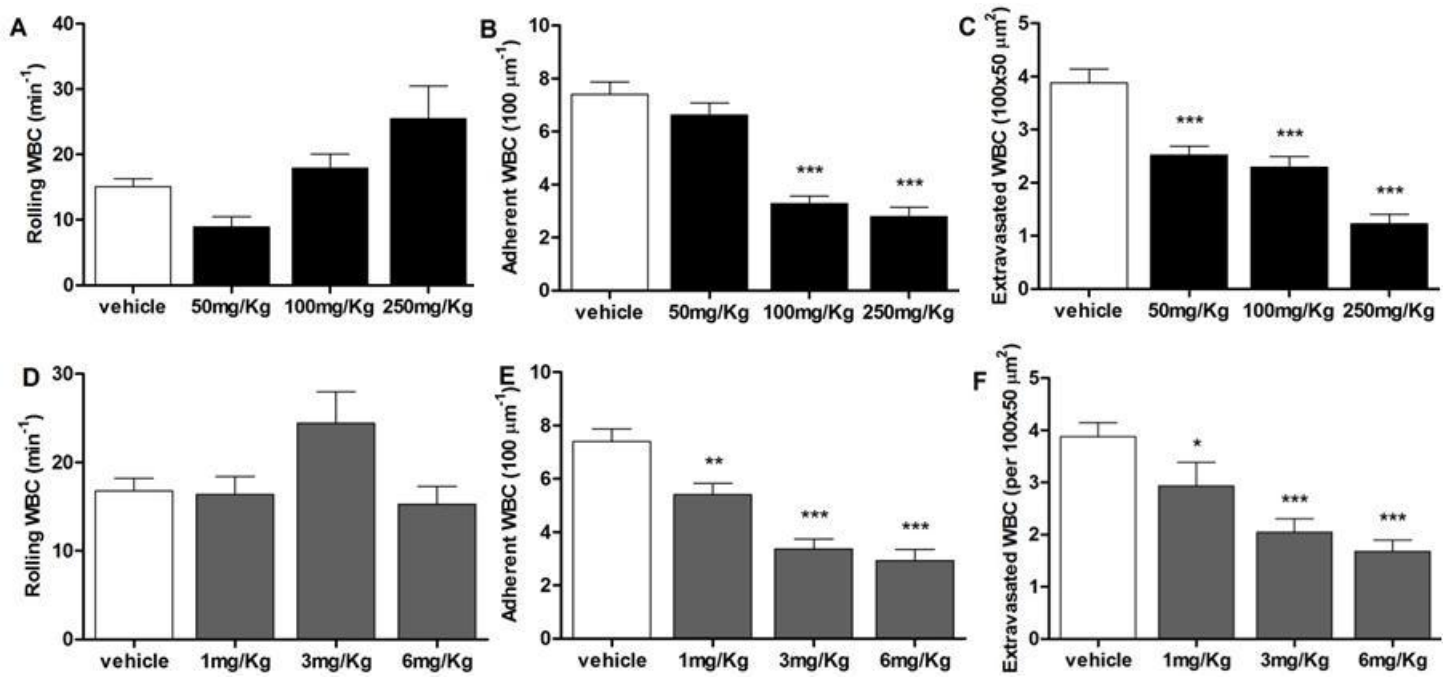

**Supplementary Figure 1. Dose response curves for Hydroxyurea and BAY73-6691.** (A) Leukocyte rolling, (B) adhesion and (C) extravasation in TNF- $\alpha$ -treated C57BL6 WT mice after administration of vehicle or hydroxyurea. n=29-55 venules per group. (D) Leukocyte rolling, (E) adhesion and (F) extravasation in TNF- $\alpha$ -treated C57BL6 WT mice after administration of vehicle or BAY73-6691. n=30-54 venules per group. \* p<0.05, \*\* p<0.01, \*\*\* p<0.001, compared to vehicle alone.

## Supplementary tables

**Table 1: Hemodynamic parameters of WT mice**

| Treatments  | Mice, n | Weight, g      | Venules, n | Venular diameter, $\mu\text{m}$ | RBC velocity, mm/s | WBC count ( $10^3/\mu\text{L}$ ) |
|-------------|---------|----------------|------------|---------------------------------|--------------------|----------------------------------|
| vehicle     | 13      | 24.7 $\pm$ 0.6 | 105        | 26.1 $\pm$ 1.0                  | 1.8 $\pm$ 0.1      | 2.3 $\pm$ 0.3 $\Delta$           |
| HU          | 5       | 25.4 $\pm$ 1.2 | 49         | 26.8 $\pm$ 1.6                  | 2.1 $\pm$ 0.4      | 2.3 $\pm$ 0.2                    |
| HU (gavage) | 5       | 27.8 $\pm$ 0.3 | 43         | 22.0 $\pm$ 0.4                  | 1.8 $\pm$ 0.1      | 2.1 $\pm$ 0.3                    |
| BAY73       | 4       | 26.5 $\pm$ 0.7 | 40         | 30.2 $\pm$ 0.5                  | 2.0 $\pm$ 0.1      | 1.8 $\pm$ 0.6                    |
| HU + BAY73  | 6       | 25.6 $\pm$ 0.7 | 44         | 25.2 $\pm$ 1.0                  | 1.5 $\pm$ 0.1      | 2.4 $\pm$ 0.2                    |

WBC – white blood cells

Data are presented as mean  $\pm$  SEM

$\Delta$  n=10

**Table 2: Hemodynamic parameters of SCD mice (chimeric)**

| Treatments  | Mice, n | Weight, g      | Venules, n | Venular diameter, $\mu\text{m}$ | RBC velocity, mm/s | WBC count ( $10^3/\mu\text{L}$ ) |
|-------------|---------|----------------|------------|---------------------------------|--------------------|----------------------------------|
| vehicle     | 15      | 27.5 $\pm$ 0.5 | 160        | 21.4 $\pm$ 0.4                  | 1.7 $\pm$ 0.1      | 5.4 $\pm$ 0.8                    |
| HU          | 5       | 25.5 $\pm$ 1.1 | 80         | 22.2 $\pm$ 0.5                  | 2.7 $\pm$ 0.2      | 7.4 $\pm$ 1.7                    |
| HU (gavage) | 3       | 27.1 $\pm$ 0.3 | 24         | 22.6 $\pm$ 0.2                  | 2.3 $\pm$ 0.6      | 6.2 $\pm$ 0.8                    |
| BAY73       | 5       | 26.3 $\pm$ 0.6 | 66         | 22.4 $\pm$ 0.5                  | 2.4 $\pm$ 0.1      | 9.4 $\pm$ 1.4                    |
| HU + BAY73  | 11      | 27.8 $\pm$ 0.4 | 90         | 20.9 $\pm$ 0.3                  | 1.8 $\pm$ 0.2      | 17.4 $\pm$ 2.7***                |

WBC – white blood cells

Data are presented as mean  $\pm$  SEM

\*\*\*, p<0.001, compared to vehicle

**Table 3: Hemodynamic parameters of native SCD mice**

| Treatments | Mice, n | Weight, g      | Venules, n | Venular diameter, $\mu\text{m}$ | RBC velocity, mm/s | WBC count ( $10^3/\mu\text{L}$ ) |
|------------|---------|----------------|------------|---------------------------------|--------------------|----------------------------------|
| vehicle    | 3       | 23.3 $\pm$ 1.5 | 30         | 20.2 $\pm$ 0.2                  | 0.9 $\pm$ 0.06     | 4.0 $\pm$ 0.6                    |
| HU + BAY73 | 3       | 23.3 $\pm$ 0.9 | 26         | 18.2 $\pm$ 1.4                  | 1.5 $\pm$ 0.3      | 4.5 $\pm$ 1.0                    |

WBC – white blood cells

\* Data are presented as mean  $\pm$  SEM
